# Supplementary material
Source: PubMed Central journal article supplement (PMC6027962)
Supplement: NIHMS77193-supplement-Supplemental_Table_S1.pdf [file NIHMS77193-supplement-Supplemental_Table_S1.pdf]

**Title:** C-peptide decline in type 1 diabetes has two phases: an initial exponential fall and a subsequent stable phase.

**Online only supplemental material**

Supplemental Table S1: Summary clinical and biochemical characteristics for the patients in the three studies: a) cross sectional UCPCR, b) longitudinal UCPCR, c) Longitudinal plasma C-peptide. Data presented as median (IQR) unless otherwise stated. For longitudinal studies, summary data are presented for the first visit only.

|                                     | Cross sectional UCPCR | Longitudinal UCPCR | Longitudinal Plasma C-peptide |
|-------------------------------------|-----------------------|--------------------|-------------------------------|
| Number of patients                  | 1549                  | 221                | 105                           |
| Number of C-peptide measurements    | 1549                  | 445                | 529                           |
| Male n (%)                          | 830 (54%)             | 119 (52%)          | 49 (47%)                      |
| BMI SDS                             | 0.89 (0.22, 1.60)     | 0.9 (0.18, 1.50)   | 0.71 (0.08, 1.68)             |
| Age at study visit (y)              | 20 (13, 34)           | 19 (12,33)         | 36 (28, 45)                   |
| Age at diagnosis (y)                | 10.8 (6.2, 15.2)      | 11 (4, 17)         | 16.3 (11.3, 21.9)             |
| Duration of diabetes (y)            | 9.6 (4.0, 20.2)       | 8.2 (3.6, 18.1)    | 21.1 (13.1, 30.0)             |
| White Caucasian n (%)               | 1518 (98%)            | 215 (97%)          | 103 (98%)                     |
| UCPCR (nmol/mmol)                   | 0.02 (0.004, 0.13)    | 0.06 (0.001, 0.28) |                               |
| UCPCR undetectable n (%)            | 319 (21%)             | 62 (28%)           |                               |
| Plasma C-peptide (pmol/l)           |                       |                    | 10 (<3, 45)                   |
| Plasma C-peptide undetectable n (%) |                       |                    | 29 (28%)                      |
